# Supplementary material for: UMAP reveals cryptic population structure and phenotype heterogeneity in large genomic cohorts
Source: PubMed Central journal article supplement (PMC6853336; doi:10.1371/journal.pgen.1008432), 2019-11-01



ONH  
OHO

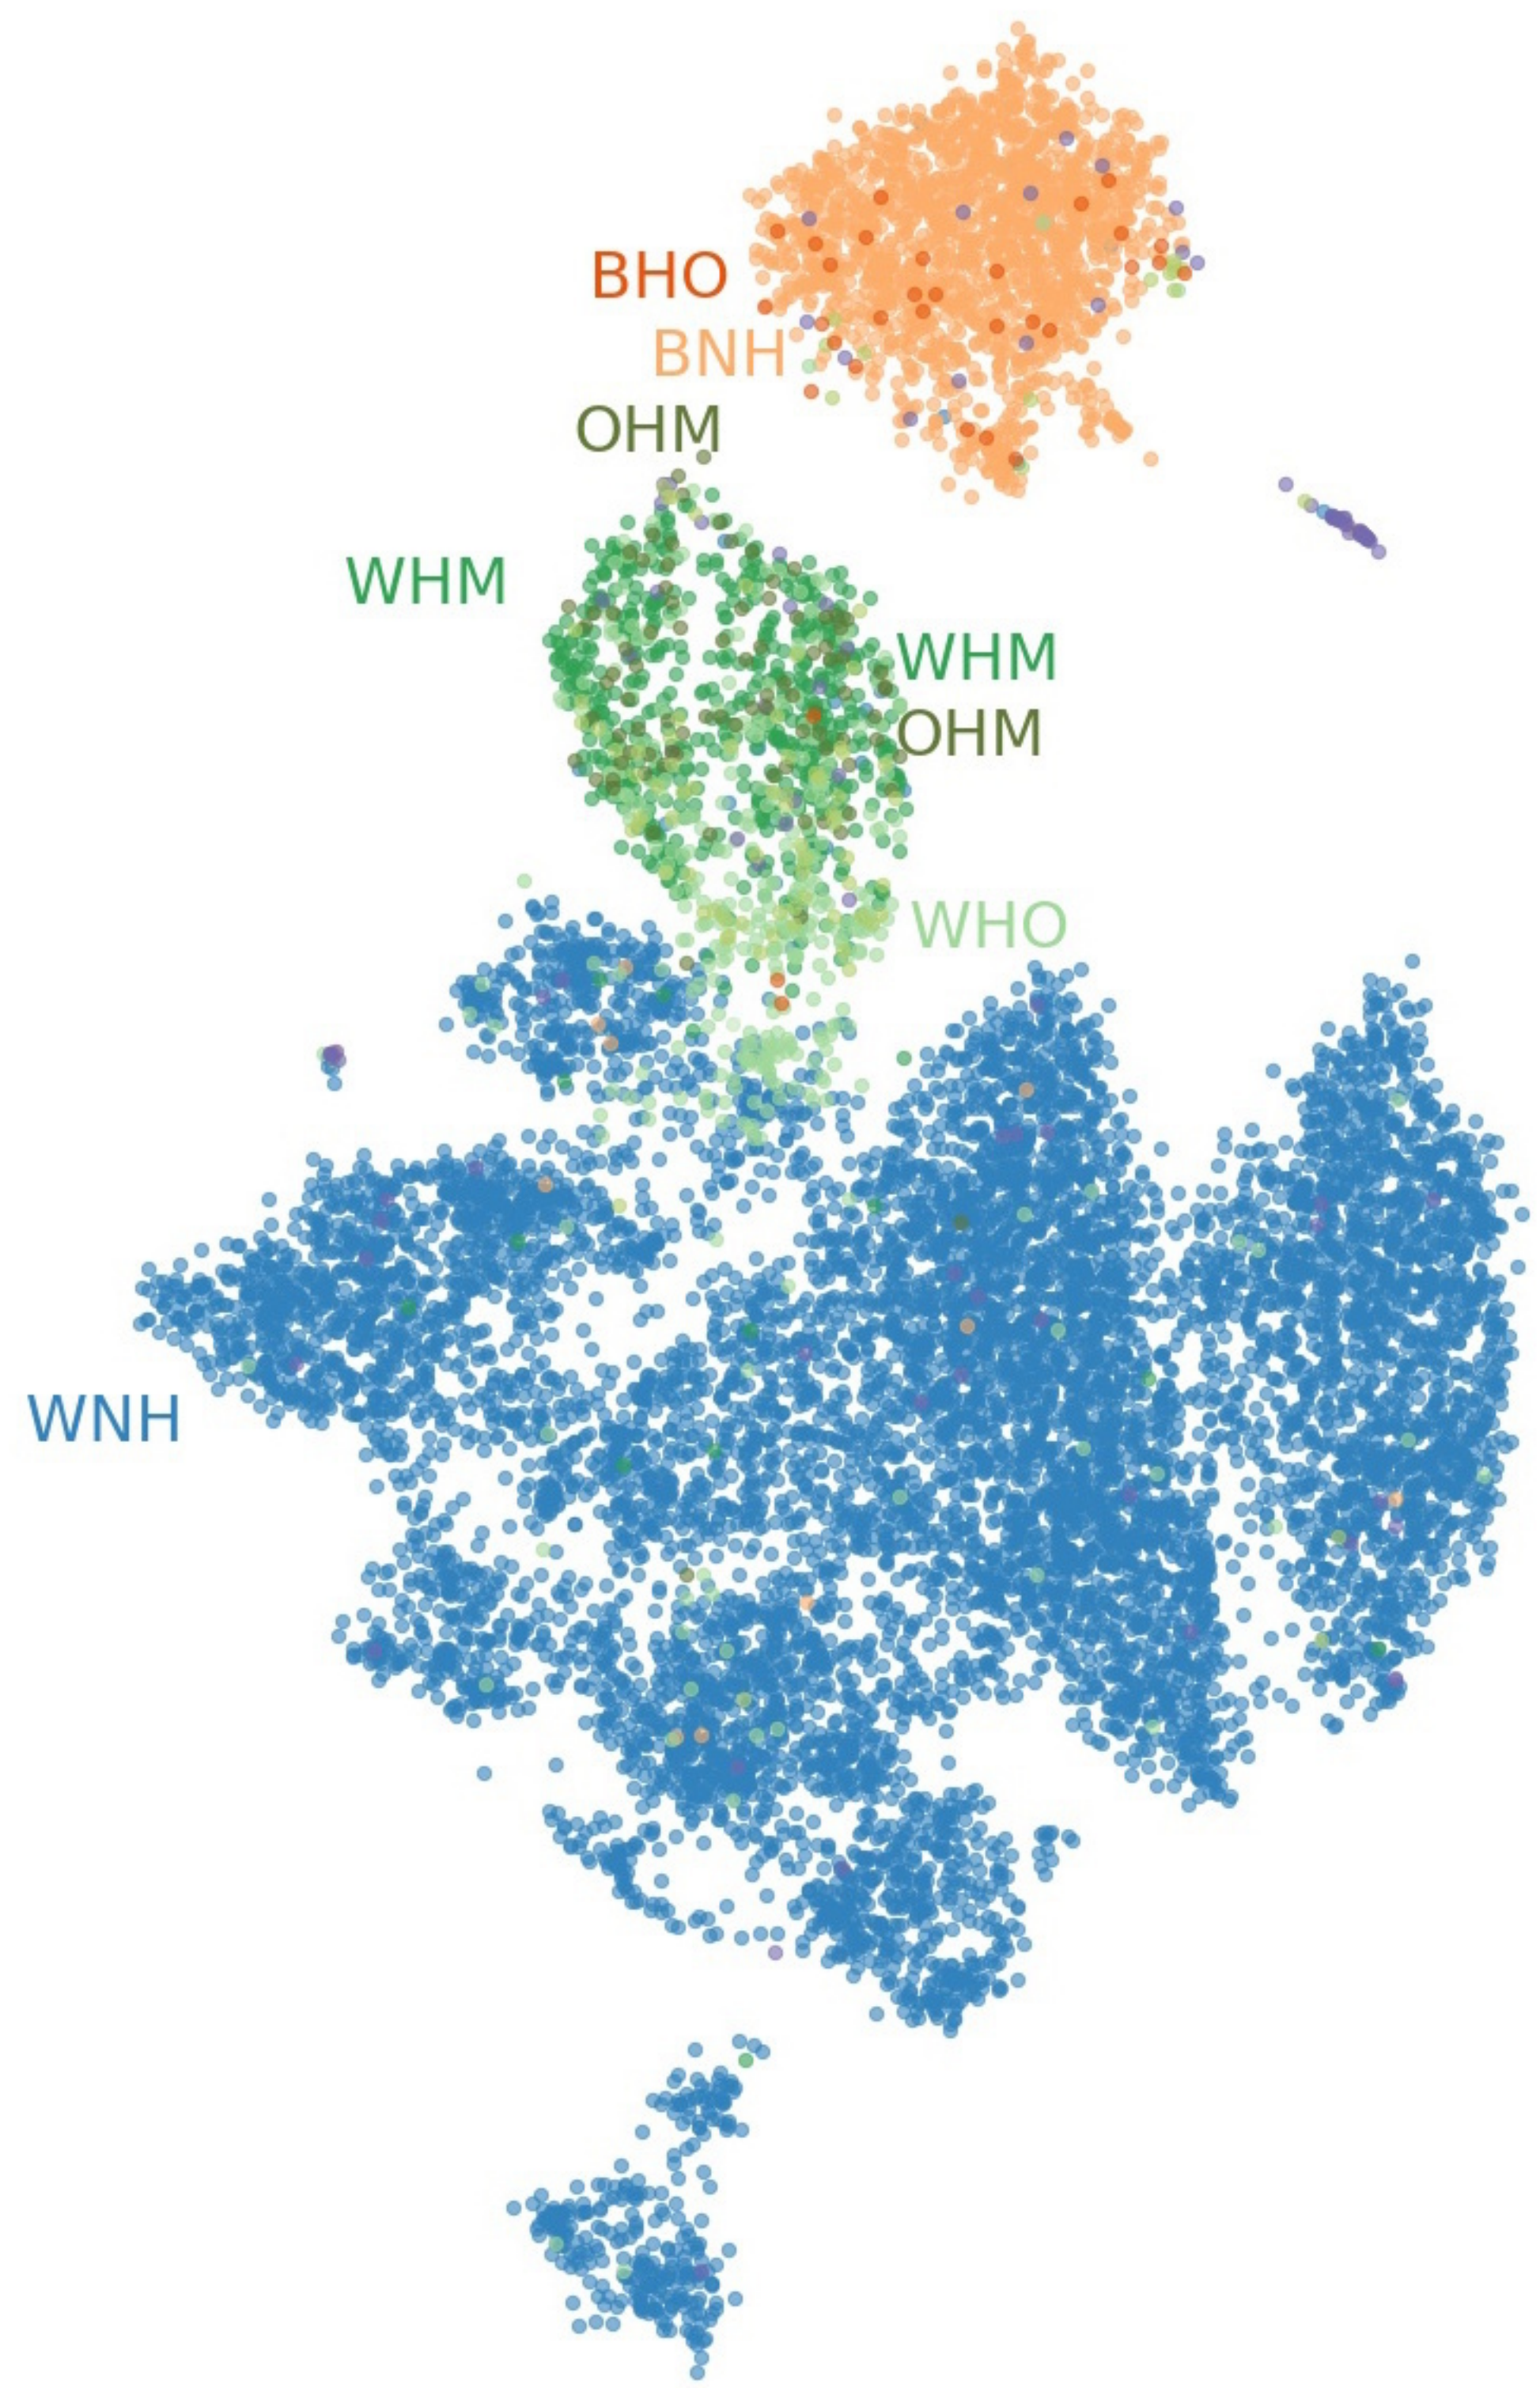

Supplement: pgen.1008432.s006.pdf [file pgen.1008432.s006.pdf]
