# Supplementary material for: UMAP reveals cryptic population structure and phenotype heterogeneity in large genomic cohorts
Source: PubMed Central journal article supplement (PMC6853336; doi:10.1371/journal.pgen.1008432), 2019-11-01
Supplement: pgen.1008432.s023.pdf [file pgen.1008432.s023.pdf]

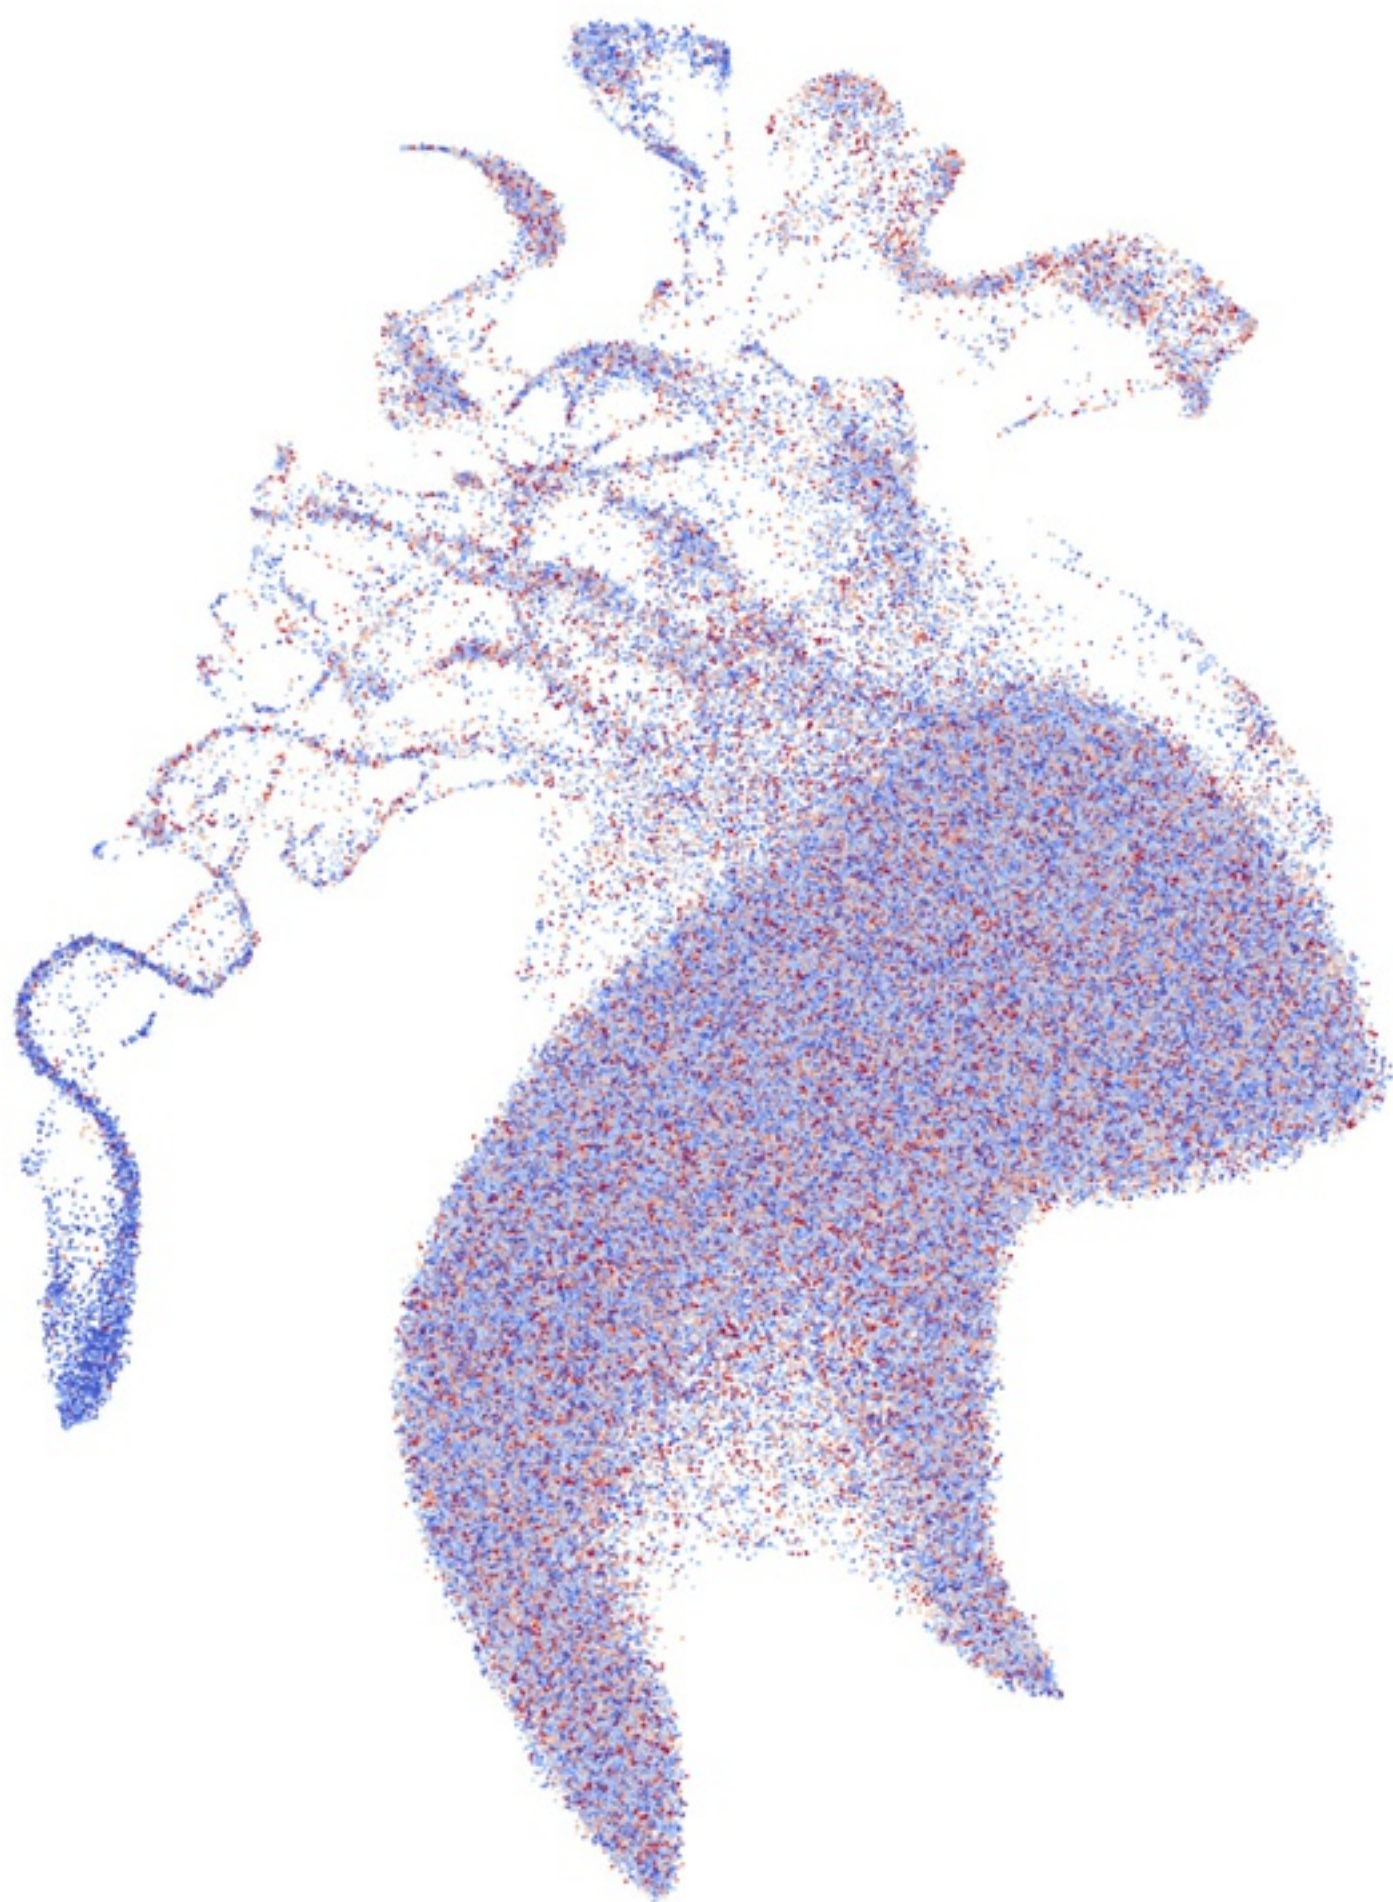

2.5 3.0 3.5 4.0 4.5 5.0 5.5 6.0 6.5  
Basophil count ( $10^9$  cells/L)
