# Supplementary material for: UMAP reveals cryptic population structure and phenotype heterogeneity in large genomic cohorts
Source: PubMed Central journal article supplement (PMC6853336; doi:10.1371/journal.pgen.1008432), 2019-11-01
Supplement: pgen.1008432.s025.pdf [file pgen.1008432.s025.pdf]

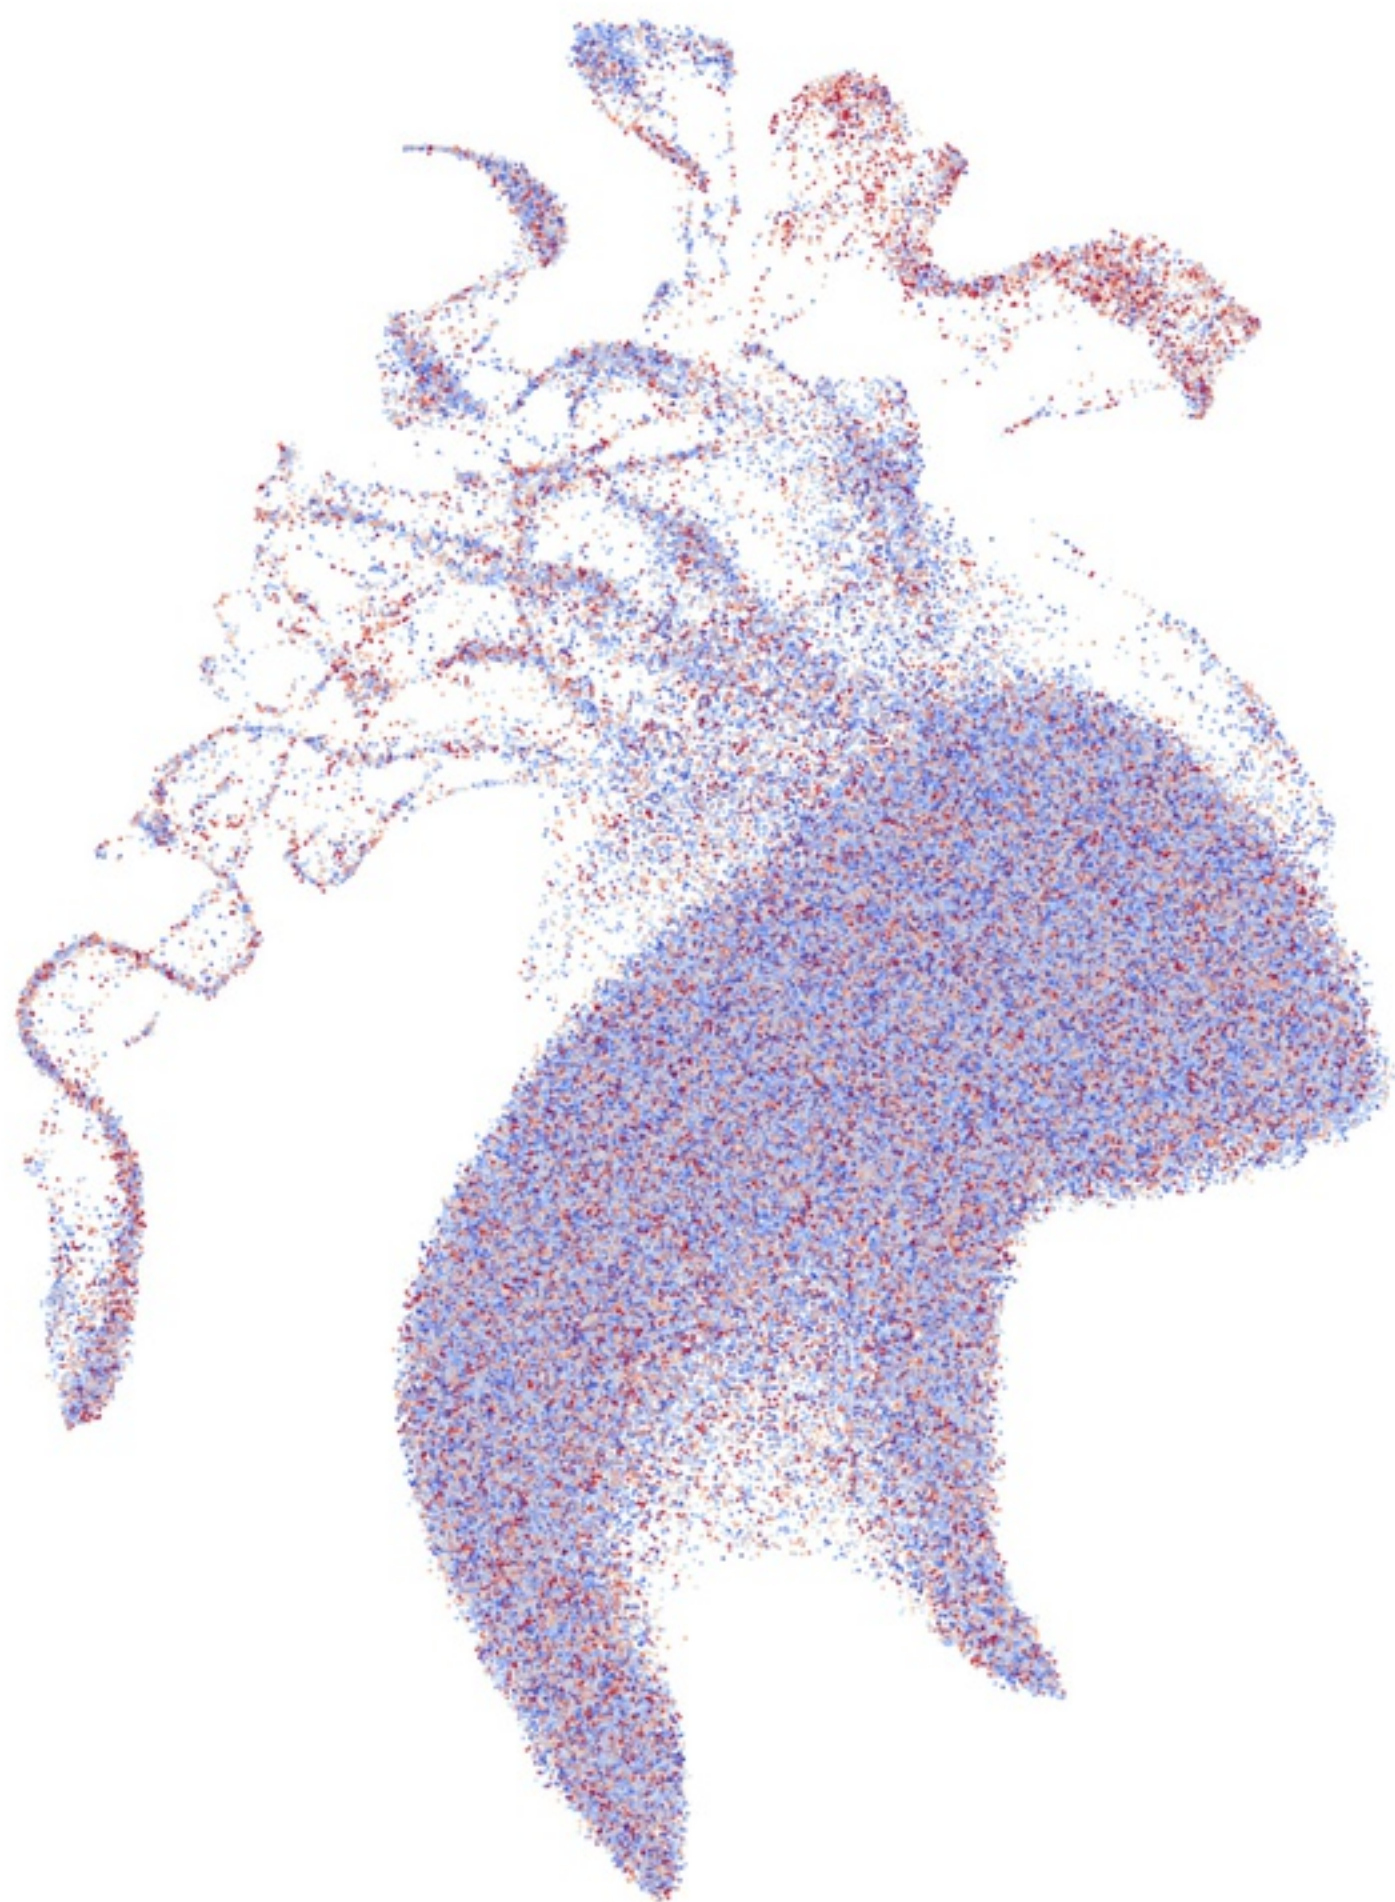

1.25 1.50 1.75 2.00 2.25 2.50 2.75 3.00  
Eosinophil count ( $10^9$  cells/L)
