# Supplementary material for: UMAP reveals cryptic population structure and phenotype heterogeneity in large genomic cohorts
Source: PubMed Central journal article supplement (PMC6853336; doi:10.1371/journal.pgen.1008432), 2019-11-01
Supplement: pgen.1008432.s030.pdf [file pgen.1008432.s030.pdf]

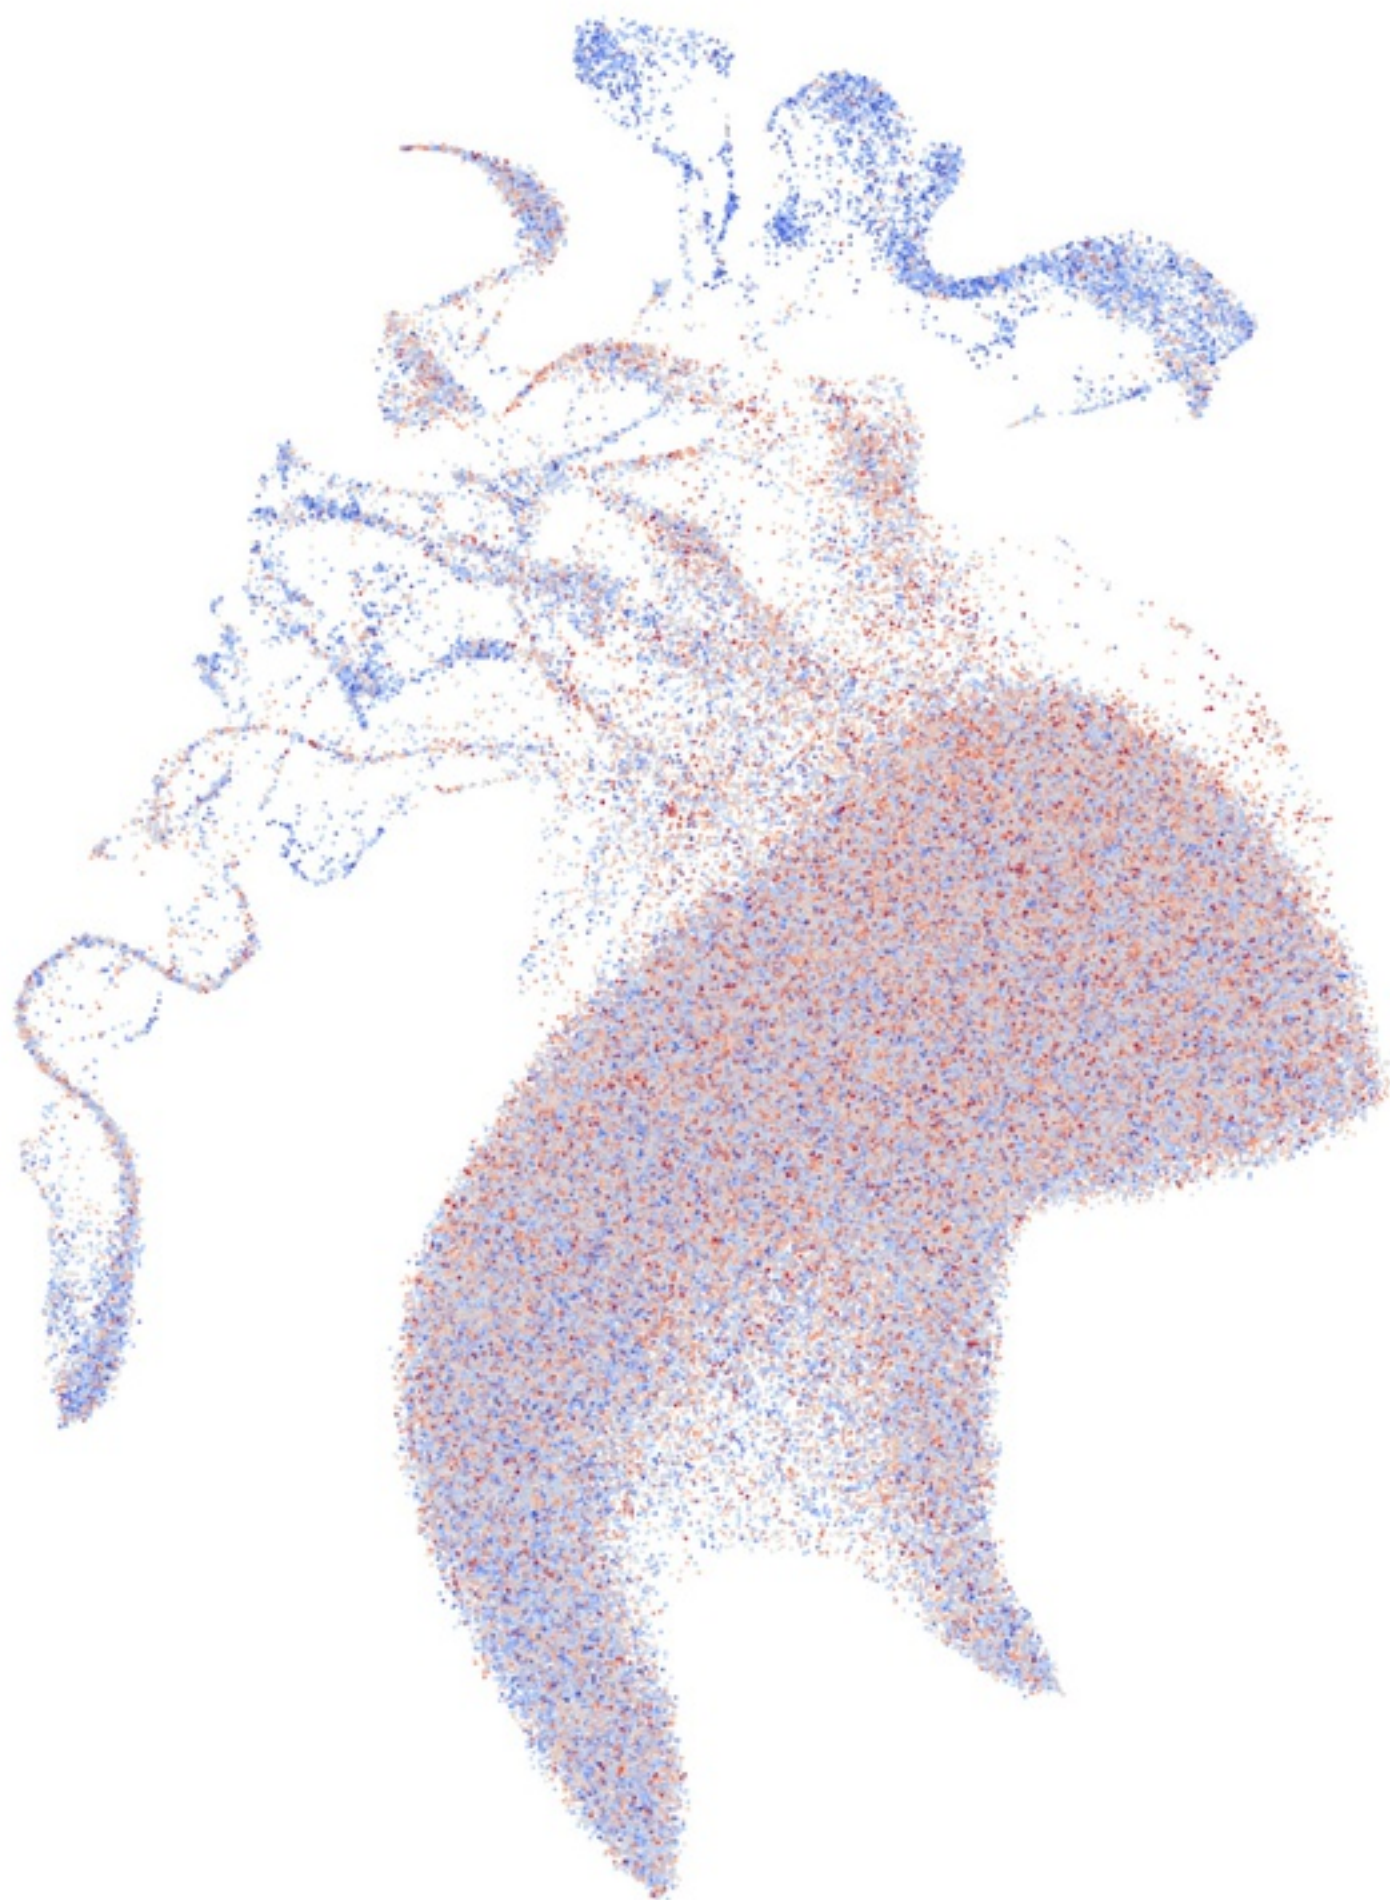

-15    -10    -5    0    5    10    15  
Age-adjusted residual height (cm)
