# Supplementary material for: UMAP reveals cryptic population structure and phenotype heterogeneity in large genomic cohorts
Source: PubMed Central journal article supplement (PMC6853336; doi:10.1371/journal.pgen.1008432), 2019-11-01
Supplement: pgen.1008432.s033.pdf [file pgen.1008432.s033.pdf]

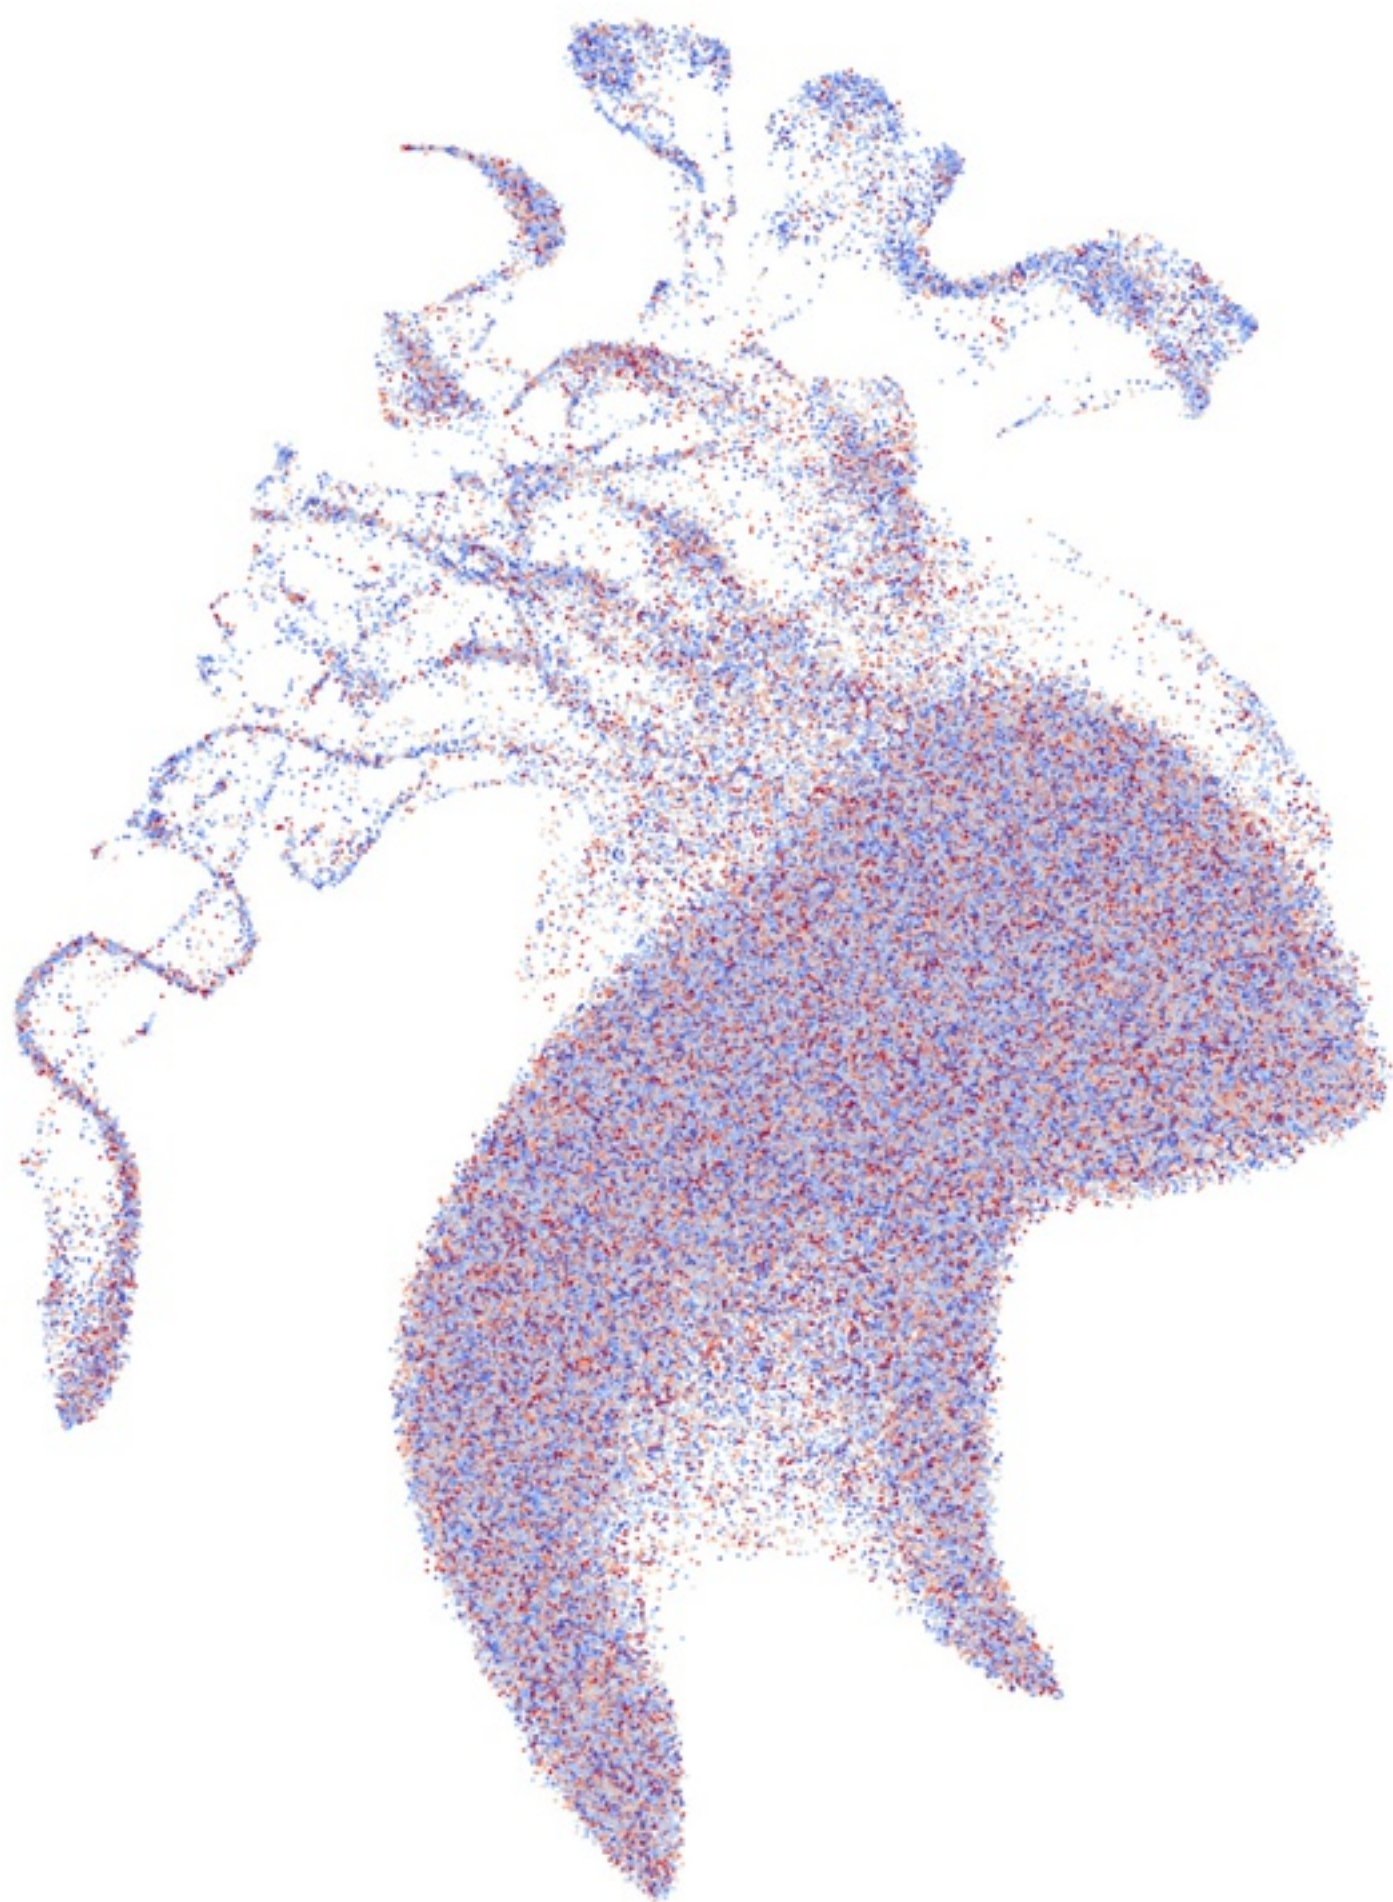

4 5 6 7 8 9

Neutrophil count ( $10^9$  cells/L)
