# Supplementary material for: UMAP reveals cryptic population structure and phenotype heterogeneity in large genomic cohorts
Source: PubMed Central journal article supplement (PMC6853336; doi:10.1371/journal.pgen.1008432), 2019-11-01

Forced expiratory volume in 1-second (female)

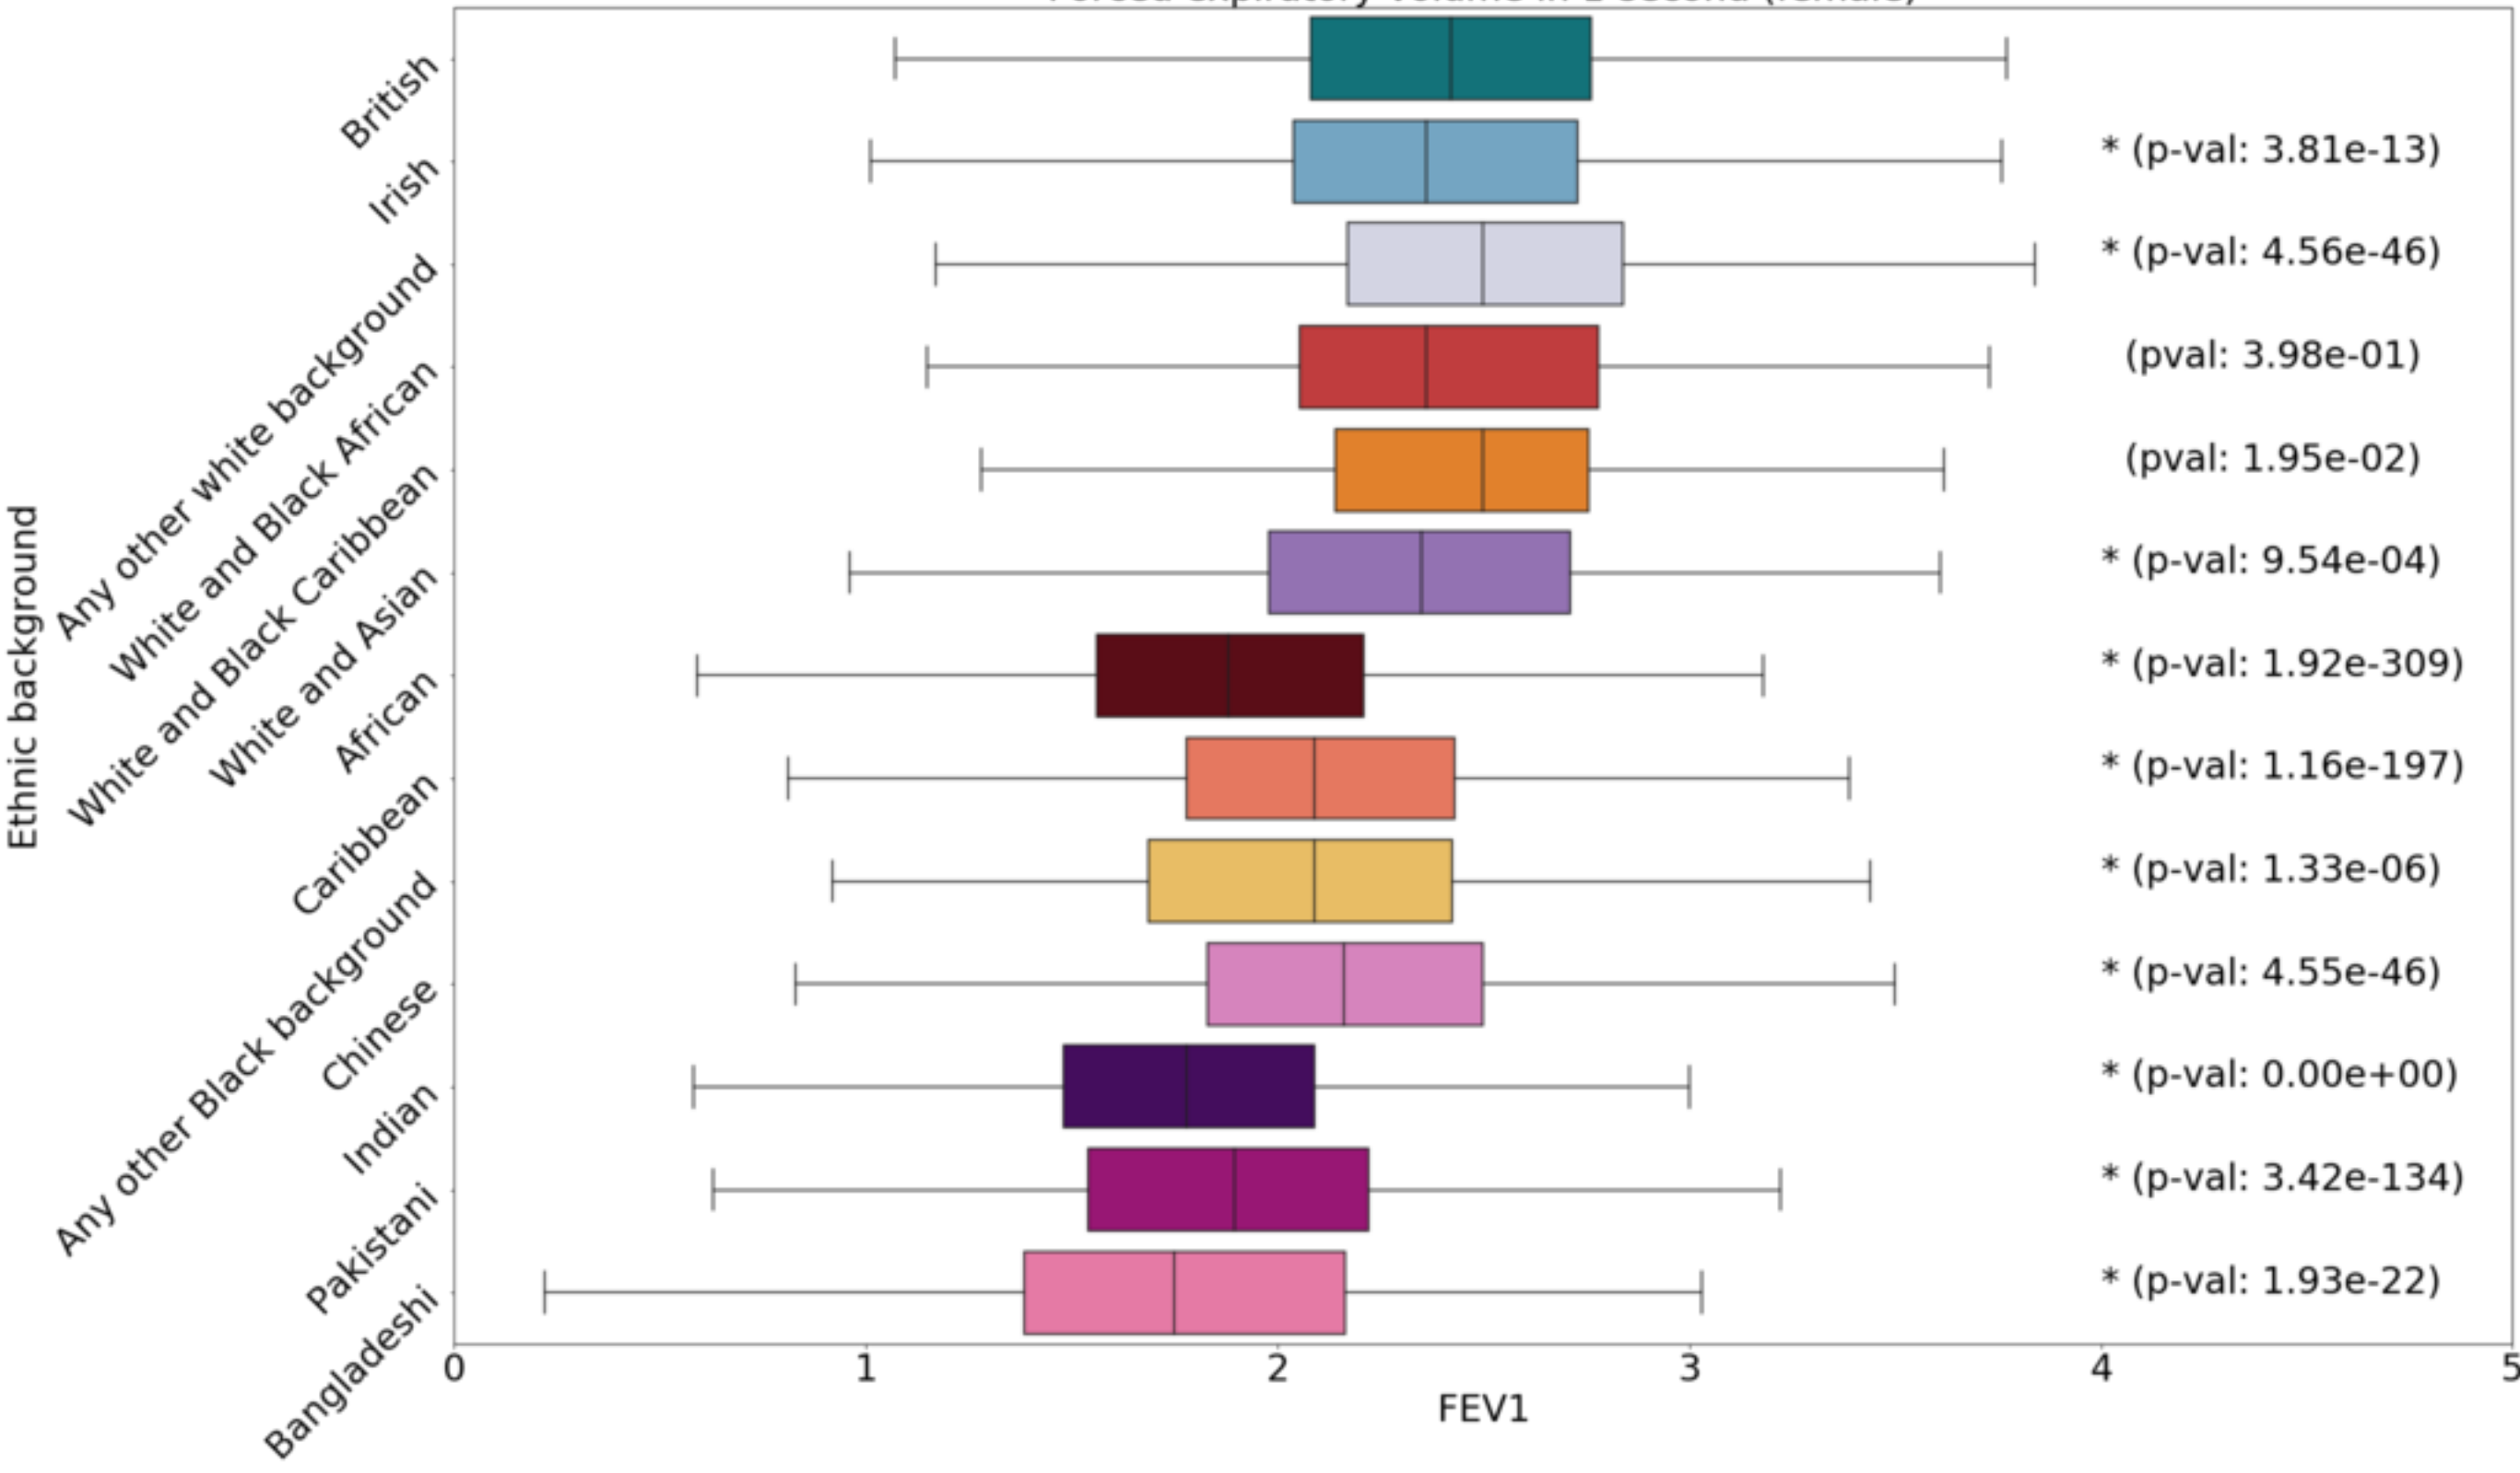

Supplement: pgen.1008432.s037.pdf [file pgen.1008432.s037.pdf]
