# Supplementary material for: UMAP reveals cryptic population structure and phenotype heterogeneity in large genomic cohorts
Source: PubMed Central journal article supplement (PMC6853336; doi:10.1371/journal.pgen.1008432), 2019-11-01
Supplement: pgen.1008432.s066.pdf [file pgen.1008432.s066.pdf]

| Number of PCs | Variance explained |
|---------------|--------------------|
| 2             | 13.6%              |
| 3             | 14.7%              |
| 4             | 15.5%              |
| 5             | 15.7%              |
| 6             | 15.8%              |
| 7             | 15.9%              |
| 8             | 16.0%              |
| 9             | 16.1%              |
| 10            | 16.2%              |
| 11            | 16.2%              |
| 12            | 16.3%              |
| 13            | 16.4%              |
| 14            | 16.5%              |
| 15            | 16.5%              |
| 30            | 17.5%              |
| 50            | 18.6%              |
| 100           | 21.3%              |
| 200           | 26.4%              |
| 300           | 31.1%              |
| 400           | 35.5%              |
| 500           | 39.7%              |
| 600           | 43.7%              |
| 700           | 47.4%              |
| 800           | 50.8%              |
| 900           | 54.0%              |
| 1000          | 57.0%              |
| 1100          | 60.0%              |
| 1200          | 62.8%              |
| 1300          | 65.4%              |
| 1400          | 68.0%              |
| 1500          | 70.5%              |
| 1600          | 73.0%              |
| 1700          | 75.3%              |
| 1800          | 77.5%              |
| 1900          | 79.7%              |
| 2000          | 81.8%              |
| 2100          | 83.8%              |
| 2200          | 85.8%              |
| 2300          | 87.6%              |
| 2400          | 89.4%              |
| 2500          | 91.1%              |
| 2600          | 92.7%              |
| 2700          | 94.2%              |
| 2800          | 95.3%              |
| 2900          | 96.3%              |
| 3000          | 97.1%              |
| 3100          | 97.8%              |
| 3200          | 98.5%              |
| 3300          | 99.2%              |
| 3400          | 99.7%              |

Table 1: Variance explained in the 1KGP data by the number of principal components used.
